1 **Abundance and diversity of resistomes differ between healthy human oral cavities and gut**

2 Victoria R. Carr<sup>1</sup>, Elizabeth Witherden<sup>1</sup>, Sunjae Lee<sup>1</sup>, Saeed Shoaie<sup>1,2</sup>, Peter Mullany<sup>3</sup>, Gordon B.  
3 Proctor<sup>1</sup>, David Gomez-Cabrero<sup>1,4,5</sup>, David L. Moyes<sup>1</sup>

4 <sup>1</sup> Centre for Host-Microbiome Interactions, Faculty of Dentistry, Oral and Craniofacial Sciences,  
5 King's College London, UK

6 <sup>2</sup> Science for Life Laboratory, KTH—Royal Institute of Technology, SE-171 21 Stockholm, Sweden

7 <sup>3</sup> Microbial Diseases, Eastman Dental Institute, University College London, UK

8 <sup>4</sup> Translational Bioinformatics Unit, NavarraBiomed, Departamento de Salud-Universidad Pública  
9 de Navarra, Pamplona, 31008, Navarra, Spain

10 <sup>5</sup> Unit for Computational Medicine, Karolinska Institutet (L8:05). Karolinska University  
11 Hospital, SE-171 76 Stockholm, Sweden.

12 Correspondence and requests for materials: [victoria.carr@kcl.ac.uk](mailto:victoria.carr@kcl.ac.uk), [david.moyes@kcl.ac.uk](mailto:david.moyes@kcl.ac.uk)

13

14

**Keywords**

15 resistome; antimicrobial resistance; microbiome; metagenomics; oral; gut

16

17

**Abstract**

18 The global threat of the “antimicrobial resistance apocalypse” that has arisen in recent years has  
19 driven the use of high-throughput sequencing techniques to monitor the profile of resistance genes  
20 in microbial populations. The human oral cavity contains a poorly explored reservoir of these genes,  
21 and little is known about their abundance and diversity, or how their profile compares with  
22 antimicrobial resistance genes in the gut. Here we analyse the resistome profiles of 790 oral cavities  
23 worldwide and compare these profiles with paired stool samples from shotgun metagenomic data.  
24 We find country-specific differences in the prevalence of antimicrobial resistance gene classes and  
25 mechanisms in oral and stool samples. Countries with a higher prevalence of resistance to antibiotic

26 classes relative to their use, contain genes resistant to those classes that co-localise with  
27 bacteriophages, suggesting the occurrence of horizontal gene transfer of these genes. Between  
28 individuals, the oral cavity contains a significantly higher abundance, but lower diversity of  
29 antimicrobial resistance genes compared to the gut, which is likely influenced by differences in  
30 microbial hosts and mobile genetic element associations. This is the first study to date that  
31 characterises the oral cavity resistome worldwide, identifying its distinctive signatures compared to  
32 the gut, and its role in the maintenance of antimicrobial resistance.

33

34

### **Introduction**

35 Recent years have highlighted antimicrobial resistance (AMR) as one of the biggest threats to  
36 global health, food production and economic development<sup>1</sup>. Given this rapidly developing global  
37 crisis, it is imperative that the current gaps in our understanding of the distribution, spread and  
38 associations of all AMR factors is filled. AMR is most often conferred through the expression of  
39 antimicrobial resistance genes (ARGs) that reduce a microbe's susceptibility to the effects of an  
40 antimicrobial compound. As such, monitoring the abundance profiles of these ARGs, or "resistome"  
41 profile, has huge potential to increase our understanding of the spread and persistence of AMR  
42 within a population. Next-generation sequencing technologies are beginning to be used as tools for  
43 screening canonical and novel ARGs for potential surveillance of antimicrobial resistance  
44 worldwide. Shotgun metagenomic data mapped against dedicated ARG databases have begun to  
45 provide a wealth of insight into the resistome in the human<sup>2-7</sup> and animal gut<sup>8,9</sup> and the  
46 environment<sup>10-13</sup>. However, no such study on a large scale has, to date, attempted to characterise the  
47 resistome in the human oral cavity. Antimicrobial resistant microbes from the oral cavity have  
48 considerable potential to lead to antimicrobial resistant infections at other body sites. For example,  
49  $\beta$ -lactam, clindamycin, and erythromycin resistant strains of streptococci resident in the oral cavity  
50 can lead to infections at other body sites such as infective endocarditis<sup>14</sup>.

51

52 There are unique ecological pressures on the oral microbial community, such as mechanical force,  
53 nutritional availability, pH levels, oxidative stress and redox potential. However, the oral microbial  
54 community has been shown to be relatively stable under these ever-changing conditions<sup>15</sup> and even  
55 after short-term antibiotic exposure<sup>16</sup>. In the oral cavity, horizontal gene transfer (HGT) has been  
56 documented as an important mechanism for the transfer and acquisition of ARGs within and  
57 between oral bacterial species<sup>17,18</sup>. The erythromycin resistance *mefA* and *mefE* genes have been  
58 found on the *MEGA* mobile genetic element associated with Tn916-like conjugative transposons  
59 (also called integrative conjugative elements ICE), and this has been implicated in conjugative  
60 transfer between viridans group streptococci (VGS) and other streptococci<sup>19</sup>.

61

62 Metagenomic studies of the oral cavity indicate that this site potentially contains a diverse range of  
63 ARGs, including those encoding resistance to tetracycline, amoxicillin and gentamicin in saliva and  
64 plaque samples<sup>20,21</sup>. Oral ARGs appear to be natural feature of the human oral cavity, as the oral  
65 resistome of isolated Amerindian communities and ancient humans, with no known exposure to  
66 antibiotics, were found to contain aminoglycoside,  $\beta$ -lactam, bacitracin, bacteriocin, macrolide,  
67 phenicol and tetracycline ARGs<sup>22,23</sup>.

68

69 Here, we derived the oral and the gut resistomes from 790 and 386 shotgun metagenomes,  
70 respectively, from healthy individuals from China<sup>24</sup>, Fiji<sup>25</sup>, the Philippines<sup>26</sup>, Western Europe<sup>27-29</sup> and  
71 the US<sup>30</sup>. We found country-specific differences in the proportion of saliva, dental and stool samples  
72 containing ARGs, ARG classes and mechanisms. Metagenomes with a higher prevalence of  
73 antibiotic classes relative to their use comprise of ARGs, resistant to those classes, that co-localise  
74 with bacteriophages, suggesting the occurrence of horizontal gene transfer. We made 410  
75 comparisons of oral resistomes with paired gut resistomes derived from stool shotgun metagenomes

76 from the same individuals. As expected, there was a greater similarity in interpersonal resistome  
77 profiles between the same body sites, than intrapersonal profiles across different body sites. Further,  
78 the oral resistome contains a higher abundance but a lower diversity of ARGs, than the gut  
79 resistome. Finally, co-occurrence analyses between ARG and species abundance profiles, for saliva  
80 and stool from China and saliva from Philippines, that contain a higher incidence of these ARGs  
81 across individuals, show contrasting co-associations between saliva and stool, and predict the  
82 species from which an ARG is derived. It is imperative, however, to note that the detection and  
83 quantities of these ARGs are indicative of potential rather than conferred AMR<sup>31</sup>. Overall, these  
84 results demonstrate the requirement for wider AMR surveillance studies at different body sites,  
85 including the oral cavity, to understand the composition of the resistome across different human  
86 microbial habitats.

87

## 88 **Results**

### 89 **Country-specific differences in ARG profiles from oral and stool metagenomes**

90

91 To establish the incidence of ARGs in oral as well as stool metagenomes collected from various  
92 locations, metagenomes were mapped and quantified against the Comprehensive Antibiotic  
93 Resistance Database (CARD)<sup>32</sup>. Saliva samples were only available from China, Fiji, the  
94 Philippines and Western Europe. The percentages of saliva samples that contain at least one ARG  
95 for each class and mechanism from these cohorts were evaluated. To account for varying read depth  
96 across samples, the samples were subsampled to the same number of sequences. The percentages of  
97 saliva samples from China, Fiji, the Philippines and Western Europe contain ARGs from 17, 14, 27  
98 and 17 classes, respectively (Fig. 1a). More ARG classes are found in Philippines saliva samples,  
99 but most of this variability originates from one individual: a farmer from Zambal who has  
100 aminocoumarin, carbapenem, diaminopyrimidine, fosfomycin, nitrofurans, nitroimidazole,  
101 rifamycin, and triclosan ARGs<sup>26</sup>. A high percentage (above 50 %) of saliva samples from all cohorts

102 contain cephamycin, fluoroquinolone, lincosamide, macrolide, pleuromutilin, streptogramin and  
103 tetracycline ARGs. Aminoglycoside and glycyclcycline classes are found in mostly Chinese saliva  
104 samples, whilst cephamycin is found less in Chinese saliva samples compared to other cohorts. The  
105 peptide ARG class is only found in Chinese and Philippines saliva. Antibiotic efflux, inactivation,  
106 target alteration and target protection mechanisms are present in all samples across all cohorts (Fig.  
107 1b), whilst the antibiotic target replacement mechanism is found in China, Philippines and Western  
108 Europe but not Fiji. The reduced permeability to antibiotic mechanism is only found in one  
109 individual from the Philippines (Fig. 1b). Dental samples were only available from China and the  
110 US. The percentages of the China and US dental samples containing at least one ARG class and  
111 mechanism were compared, and found to consist of 16 and 18 ARG classes, respectively (Fig. 1c).  
112 A greater percentage of China than US dental samples contain sulfonamide/sulfone ARGs.  
113 Similarly to saliva, a high percentage (above 50 %) of dental samples contain cephamycin,  
114 fluoroquinolone, glycyclcycline, lincosamide, macrolide, pleuromutilin, streptogramin and  
115 tetracycline ARGs for all cohorts. Antibiotic efflux, inactivation, target alteration, target protection  
116 and antibiotic target replacement mechanisms are present in all samples across both cohorts (Fig.  
117 1d). Stool samples were available from all locations, apart from the Philippines. Stool samples from  
118 China, Fiji, the US and Western Europe were found to contain 31, 31, 19 and 30 ARG classes,  
119 respectively (Fig. 1e). A high percentage of stool samples in most cohorts contain cephalosporins,  
120 cephamycins, diaminopyrimidines, macrolides, lincosamides, streptogramins and tetracyclines. Fiji  
121 samples have the lowest percentages of these ARG classes. In addition to the US containing the  
122 fewest number of ARG classes, the US also contains a low proportion of fluoroquinolones and  
123 phenicols that are found in a high proportion of stool samples from China, Fiji and Western Europe.  
124 Antibiotic efflux, inactivation, target alteration, target protection and antibiotic target replacement  
125 mechanisms are present in all samples across all cohorts, but the reduced permeability to antibiotic  
126 mechanism is only found in China, Fiji and Western Europe, and not the US (Fig. 1f).

127

128 In saliva, dental and stool samples, most of these highly prevalent ARG classes are represented by  
129 the presence of only a few ARGs. In particular, only one ARG, *APH(3')-Ia*, encapsulates the high  
130 prevalence of the aminoglycoside ARG class in saliva from China (Supplementary Fig. 1a), and  
131 only one ARG, *RlmA(II)*, represents the high proportion of the lincosamide and macrolide ARG  
132 classes in saliva and dental samples from all cohorts (Supplementary Fig. 1a, b). Again, the ARGs,  
133 tetQ, tetO and tetW comprise the majority of the tetracycline ARG class across all cohorts in stool  
134 samples (Supplementary Fig. 1c).

135

136 To evaluate whether the prevalent ARGs in the oral cavity are related to antibiotic use, the  
137 percentage of samples containing ARG classes were compared to the “Defined Daily Doses Per  
138 1000 individuals” for the equivalent antimicrobial drug class for each region. Percentages of saliva,  
139 dental and stool samples containing ARG classes do not follow antibiotic use linearly for each  
140 location. In particular, there is a high percentage of samples containing aminoglycoside ARG  
141 classes in China, macrolide and tetracycline ARG classes in all sites from all locations,  
142 cephalosporin ARG classes in stool samples from all locations, and fluoroquinolone ARG classes in  
143 stool samples from China and in oral sites from all locations (Fig. 1g). Analyses of the predicted  
144 synteny between phages and ARGs in assembled metagenomes indicated that ARGs that are found  
145 in most samples or in particular body sites, and confer resistance to these classes, may have been  
146 previously acquired rapidly via HGT. For example, all samples containing the aforementioned  
147 *APH(3')-Ia* ARG in saliva samples from China are associated with *Enterobacteria* phage DE3 along  
148 with the tetracycline ARG *tet(C)* (Supplementary Fig. 2). Most dental and saliva samples across all  
149 locations contain macrolide ARGs, *mefA* and *mel*, that are associated with *Streptococcus* phage  
150 phiNJ3/phiSC070807 and often with *ermB*, which is likely to form the *MEGA* (macrolide efflux  
151 genetic assembly) element previously found in *Streptococcus* species<sup>33–35</sup>. In another instance,

152 aminoglycoside ARGs, in particular *APH(3')-IIIa*, *aad(6)*, and *AAC(6')-Ie-APH(2'')-Ia*, found in  
153 most stool samples from Western Europe and China (Supplementary Fig. 1c), are syntenic with  
154 *Escherichia* phage 1720a-02, *Staphylococcus* phage SPbeta-like, and *Streptococcus* phage  
155 phiSC070807/phi-SsUD.1/phiJH1301-2 (Supplementary Fig. 2).

156

157 Another possibility is that antibiotic use may be underestimated in China and the Philippines  
158 especially, as antibiotics are more readily available across-counter in these countries as well as via  
159 prescriptions and are found as contaminants in water and food supplies<sup>36-38</sup>. Antibiotics are also used  
160 more widely in husbandry and the fishing industry in China, the Philippines and the US, whereas  
161 the European Union banned the use of antimicrobials as animal growth promoters in 2006<sup>39,40</sup>.  
162 Although antimicrobial resistant microbes and ARGs can transfer from animals and the  
163 environment to humans, the impact of antimicrobial use in agriculture and livestock farming on  
164 AMR incidence and prevalence in humans is poorly understood<sup>41</sup>.

165

166 **Comparisons between oral and gut resistomes reveal differences in ARG composition,**  
167 **abundance and diversity**

168

169 To determine whether there are differences in ARG composition between oral and gut samples, the  
170 separation of the ARG incidence profiles, i.e. resistotypes, for each sample were evaluated using  
171 principal coordinates analysis. Resistotypes were extracted using hierarchical clustering and  
172 silhouette analysis<sup>42</sup>. Five resistotypes in total were identified, where most samples are found in four  
173 out of the five resistotypes, and oral resistotypes clustered separately from stool resistotypes (Fig.  
174 2a). Saliva from China and the Philippines have similar resistome profiles to those from US dorsum  
175 of tongue, buccal mucosa and dental samples in Resistotype R1, whereas resistome profiles from  
176 Fiji and Western Europe saliva cluster separately in Resistotype R3 (Fig. 2b). Similarly, there is a

177 strong separation of Resistotype R4 represented by mainly China and some Fiji stool samples, and  
178 Resistotype R5 represented by mainly US and the remaining Fiji stool samples.

179

180 To further investigate the differences between oral and gut resistome profiles, the abundance and  
181 diversity between oral and gut samples were evaluated and compared. The total abundance,  
182 measured as the total Reads Per Kilobase Million (RPKM), of all ARGs in gut samples is lower  
183 than in oral (buccal mucosa, dental dorsum of tongue and saliva) samples across all pairwise  
184 comparisons in all cohorts (Fig. 3a). The overall abundance is similar between paired US oral sites,  
185 with buccal mucosa and dental having a slightly higher abundance than the tongue dorsum samples  
186 (Supplementary Fig. 3). Oral samples contain a higher abundance of fluoroquinolone, macrolide,  
187 multidrug macrolide/lincosamide, and multidrug macrolide/streptogramin ARGs than stool samples  
188 (Fig. 3b, Supplementary Fig. 4). These classes are mostly dominated by one of two ARGs across all  
189 cohorts, such as *patB* and *pmrA* ARGs in the fluoroquinolone class (Supplementary Fig. 5a, b, c, d).  
190 Stool contains a higher abundance of tetracyclines and “Other” ARGs less commonly found in all  
191 samples across all cohorts and more cephamycin ARGs in stool than saliva, particular from Fiji  
192 (Fig. 3b, Supplementary Fig. 4). These “Other” ARGs are most found in aminocoumarins,  
193 aminoglycosides, cephalosporins, diaminopyrimidines, penams, penems and peptides across all  
194 cohorts (Supplementary 5a, b, c, d). Unlike the higher abundance of a few ARGs in each class from  
195 oral samples, stool samples contain a diverse mixture of ARGs for each class. Between oral samples  
196 from the US, there are more fluoroquinolone, macrolide and lincosamide ARGs, but fewer  
197 cephamycin ARGs in buccal mucosa, and more tetracycline ARGs in the tongue dorsum.

198

199 The availability of the longitudinal buccal mucosa, dental, tongue dorsum and stool samples from  
200 the US over two years, from individuals who did not take antimicrobial agents, afforded us the  
201 ability to investigate the stability of resistomes over time. Hierarchical clustering revealed that the



202 same individuals and sample types cluster together, verifying resistomes remain stable over a long  
203 period in both the oral cavity and gut with no antimicrobial use (Supplementary Fig. 6).  
204  
205 The abundance of ARGs were compared between sample types using differential analysis with  
206 DESeq2<sup>43</sup>. Stool samples contain more diverse ARGs with a significantly higher abundance than  
207 oral samples across all cohorts (Supplementary Fig. 7). Specifically, these include *CfxA* beta-  
208 lactamase family ARGs, the cephalosporin *Cbla-1* ARG (found in *Bacteroides uniformis*, a  
209 common commensal in the gut microbiota<sup>44</sup>), the diaminopyrimidine *dfrF* ARG, MLS (macrolide-  
210 lincosamide-streptogramin) Erm 235 ribosomal RNA methyltransferase family ARGs, multidrug  
211 ARGs (all conferring resistance via multidrug efflux pumps), and tetracyclines *tet(40)*, *tet32*, *tetQ*,  
212 *tetO* and *tetW* ARGs. Oral samples have a higher abundance of ARGs than in stool samples, but  
213 fewer are significant compared to stool samples. In particular, macrolide ARGs, *macA* and *macB*,  
214 fluoroquinolone ARGs, *patB* and *pmrA*, and the macrolide/lincosamide ARG *RlmA(II)*, are found to  
215 be significantly more abundant in oral than stool samples across all cohorts. There are also  
216 differentially abundant ARGs between different sites in the oral cavity. For instance, between the  
217 US dorsum of tongue and dental samples, and between the US dorsum of tongue and buccal  
218 mucosa, all significantly abundant ARGs are found in the dorsum of tongue. Similarly, between  
219 dental and buccal mucosa, all significantly abundant ARGs are found in dental samples. Most of  
220 these ARGs are resistant to cephamycin, fluoroquinolone, MLS and tetracycline antibiotics. From  
221 China, saliva contains more significantly abundant ARGs than dental, in particular, resistance to  
222 aminoglycoside, cephalosporin, fluoroquinolone (specifically *pmrA* and *patB*), lincosamides,  
223 macrolides (specifically *macB* and *mefA* ARGs), MLS (in particular to the *Erm 235* ribosomal RNA  
224 methyltransferase family) and tetracycline antibiotics. Overall, stool samples contain ARGs  
225 conferring resistance to a greater diversity of ARG classes compared to oral samples, especially

226 multidrug ARGs that express efflux pumps. In comparison, oral samples contain ARGs, where each  
227 ARG confers resistance to no more than three antibiotic classes.

228

229 To investigate ARG diversity further, the ARG richness was evaluated between pairwise  
230 comparisons of sample types for each cohort. ARG richness is defined as the number of unique  
231 ARGs per sample. China, US and Fiji stool samples have a significantly higher ARG richness than  
232 paired China dental and saliva, US dental and buccal mucosa, and Fiji saliva samples (Mann-  
233 Whitney, paired, two-sided t-test, p-value < 0.05) (Fig. 4). This suggests stool samples contain a  
234 more diverse range of ARGs than some oral samples across most cohorts. No significant difference  
235 was found between saliva and stool samples from Western Europe. However, the US dorsum of  
236 tongue contains a significantly higher ARG richness than US stool. From pairwise comparisons  
237 between oral sites (Supplementary Fig. 8), China saliva has a greater ARG richness than dental  
238 samples (Mann-Whitney, paired, two-sided t-test, p-value < 0.05). US dorsum of tongue has a  
239 higher ARG richness than both dental and buccal mucosa, and dental also has a greater ARG  
240 richness than the buccal mucosa.

241

#### 242 **Oral and gut ARG profiles associate with species and strains**

243 Spearman's correlation analysis between ARG and species/strain abundance was conducted to  
244 determine whether it is possible to predict the origin of ARGs. Only significant correlations were  
245 found in saliva and stool from China, and saliva from the Philippines. The *CfxA* beta-lactamase  
246 family, *tetQ*, *patB* and *pmrA* ARGs are all strongly correlated with specific species or strains found  
247 in both countries (Fig. 5a, b). Cephamycin ARGs, *CfxA*, *CfxA2*, *CfxA4* and *CfxA5* correlate with  
248 *Prevotella sp.*, *Megasphaera micronuciformis* GCF 000165785 and *Selonomonas fluggei* GCF  
249 000160695, and the tetracycline ARG, *tetQ*, co-associates with *Prevotella sp.* in both countries. In  
250 addition, fluoroquinolone ARGs, *patB* and *pmrA*, that are highly abundant in oral samples, co-occur

251 with *Gemella haemolysans* and *Streptococcus mitis/oralis/pneumoniae* in both countries (Fig. 5a,  
252 b). Also highly abundant in oral samples, macrolide ARG, *macB*, is associated with *Kingella*  
253 *denitrificans* GCF 000190695, *Neisseria sicca* and *N. flavescens* in China (Fig. 5a), and with  
254 *Neisseria subflava* GCF 000173955, *N. gonorrhoeae*, *Campylobacter rectus* GCF 000174175 and  
255 *Aggregatibacter aphrophilus* in the Philippines (Fig. 5b). In contrast to China saliva, *Escherichia*  
256 *coli* in China stool is co-associated with many ARGs that code for multidrug efflux pumps  
257 (Supplementary Fig. 9). ARGs *E. coli ampC beta-lactamase*, *E. coli acrA* and *E. coli mdfA* co-occur  
258 with *E. coli*, *Bifidobacterium ileS* with *Bifidobacterium longum* and *Bifidobacterium adolescentis*,  
259 and *Klebsiella pneumoniae acrA* with *Klebsiella pneumoniae*, as expected. The multidrug ARGs,  
260 *oqxA* and *oqxB*, co-associate with *Klebsiella pneumoniae*, an intestinal commensal which can cause  
261 infections such as pneumonia, sepsis, meningitis and urinary tract infections<sup>45</sup>. These observations  
262 demonstrate that correlation analysis can potentially be applied as a predictor of ARG origin.

263

### **Discussion**

264 This study provides insights into the ARG resistome profiles of different intraoral sites from healthy  
265 individuals across different geographical locations, and compares their composition to ARGs in the  
266 gut. At a population level, there are country-specific differences in the prevalence of ARGs, ARG  
267 classes and resistance mechanisms in saliva, dental plaque and gut. Phageome analysis of  
268 assembled metagenomes show ARG classes that are highly represented by these sites relative to the  
269 antibiotic class use, may consist of ARGs that are associated with phages, and have been acquired  
270 by horizontal gene transfer.

271

272 Within individuals, differential abundance analysis between sample types show higher abundances  
273 of ARGs in the oral cavity compared to the gut across all locations, especially for macrolide ARGs,  
274 *mel* and *mefA*, fluoroquinolone ARGs, *patB* and *pmrA*, and macrolide/lincosamide ARG *RlmA(II)*.  
275 Co-occurrence analysis of saliva samples from China and the Philippines predicts *patB* and *pmrA*

276 originate from *Gemella haemolysans* and *Streptococcus mitis/oralis/pneumoniae*, and phage  
277 analysis shows *mel* and *mefA* are located with *Streptococcus* phages phiNJ3 and phiSC070807 in  
278 saliva and dental samples.  
279  
280 However, most sites in the oral cavity (saliva, dental and buccal mucosa) have a lower diversity of  
281 ARGs than the gut. The sole exception is the dorsum of the tongue from the US. Sites in the oral  
282 cavity, including cheek, dental plaque and tongue, host microbial biofilm structures. It is believed  
283 the close proximity of microbes within oral biofilms can be a conducive environment for HGT of  
284 ARGs<sup>46</sup>. The unique papillary structure on the dorsum of the tongue acts as complex  
285 microbiological niche and favours the deposition of oral debris and microbes<sup>47</sup>, which may explain a  
286 higher diversity of ARGs in the dorsum of the tongue compared to other oral sites. The higher  
287 abundance and lower diversity of ARGs in the oral cavity compared to stool samples may be due to  
288 several factors. One factor could be the difference in species resident in the gut compared to the oral  
289 cavity. As shown in ARG-species/strain correlation analysis of Chinese stool, *Escherichia coli*  
290 strains are predicted to contain a variety of ARGs, especially of the multidrug class, whereas species  
291 found in saliva were estimated to contain fewer ARGs. Due to stringent constraints of the  
292 correlation analysis, however, it was not possible to predict the origins for all ARGs found.  
293 Antibiotic use leading to acquisition of ARGs is another potential factor. Pharmacokinetics of orally  
294 administered antibiotics suggests that the oral cavity and oesophagus would be only briefly exposed  
295 to the antibiotic during swallowing, then the gut would subsequently be exposed, but over a more  
296 prolonged period as the antibiotics are held in the stomach lumen and intestine before being  
297 absorbed via the intestinal epithelium into the bloodstream. Therefore, microbes in the gut will be  
298 exposed to antibiotics for a longer period of time due to their increased bioavailability, which will  
299 result in higher antibiotic selection pressures than in the oral cavity<sup>48</sup>. The incidences where the oral

300 cavity is likely to acquire ARGs from selective pressures of antibiotics are from topical antibiotics  
301 for periodontal infections or orally-administered antibiotics being absorbed into the bloodstream.  
302  
303 The differences in ARG profiles across body sites has significant implications for the  
304 characterisation and interpretation of resistome analyses. Previous shotgun metagenomic studies  
305 have focussed almost exclusively on the resistome from the human gut<sup>2-4,6</sup>. While the gut may be a  
306 significant reservoir of ARGs, some of these may not be particularly prevalent with very little  
307 potential to drive resistant infections at other body sites. Further, the lower abundance of ARGs in  
308 the gut may be the result of some of the highly diverse ARG population only being present in  
309 species that are unable to transcribe them and are therefore irrelevant. Therefore, to test potential  
310 applications of non-cultured based, metagenomic AMR surveillance, future studies need to  
311 characterise the resistome of different body sites that have had different pharmacokinetic exposures  
312 to antimicrobials, and integrate this information with culture-based susceptibility tests,  
313 culturomics<sup>49</sup> and functional metagenomic screens<sup>50</sup>.

314

315

316

## **Methods**

### **Metagenomic sequence data**

317  
318 A total of 1176 publicly available metagenomic samples from six countries, including longitudinal  
319 US samples, were analysed. US samples after the first time point were excluded from the majority  
320 of the study to ensure each sample was independent, unless specified otherwise. These samples  
321 include 1) longitudinal data across two years with various timepoints from the Human Microbiome  
322 Project 1 (referred to as US)<sup>30</sup> containing buccal mucosa (n = 165: 32 with one, 35 with two, 19  
323 with three and 1 with six timepoints); dorsum of tongue (n = 188: 22 with one, 43 with two, 24 with  
324 three and 2 with four timepoints); dental (n = 191: 23 with one, 43 with two, 20 with three, 1 with

325 four and 3 with six timepoints); stool (n = 156: 13 with one, 33 with two, 21 with three, 2 with four  
326 and 1 with six timepoints), 2) healthy control samples from a Chinese rheumatoid arthritis study<sup>24</sup>  
327 containing dental (n = 32); saliva (n = 33); stool (n = 72), 3) saliva (n = 137) and paired stool (n =  
328 137) samples from Fiji<sup>25</sup>, 4) saliva samples (n = 23) from healthy hunter-gatherers and traditional  
329 farmers from the Philippines<sup>26</sup>, and 5) saliva (n = 21) and stool (n = 21) samples from Western  
330 Europe (5 saliva and 5 stool samples from Germany<sup>27,29</sup>, and 16 saliva and 16 stool samples from  
331 France<sup>28,29</sup>).

332

333 Raw paired-end metagenomic reads from Chinese and Philippines samples were downloaded from  
334 the EBI (<https://www.ebi.ac.uk/metagenomics/>). Paired-end metagenomic samples from US were  
335 downloaded from <https://portal.hmpdacc.org/>. Raw paired-end metagenomic reads from Fiji  
336 (project accession PRJNA217052), France and Germany (project accession PRJEB28422) were  
337 downloaded from the NCBI. All US, China, Fiji and Philippines samples, and stool samples from  
338 France and Germany, were collected and sequenced as described in the following cited studies<sup>24-</sup>  
339 <sup>28,30</sup>. Saliva samples from France and Germany were collected and sequenced as described in the  
340 following cited study<sup>29</sup>. Metadata for the samples can be found in Supplementary Table 1.

341

### 342 **Processing metagenomic data**

343 The raw reads for all samples were trimmed using AlienTrimmer 0.4.0<sup>51</sup> with parameters *-k 10 -l 45*  
344 *-m 5 -p 40 -q 20* and Illumina HiSeq and Ion Proton primers. Human contaminant sequences were  
345 removed from all samples by discarding reads that mapped against a human reference genome  
346 (downloaded from Human Genome Resources at NCBI on 27<sup>th</sup> February 2017) using Bowtie2  
347 2.2.3<sup>52</sup> with parameters *-q -N 1 -k 1 --fr --end-to-end --phred33 --very-sensitive --no-discordant*. The  
348 quality of the raw reads and the filtered reads of each sample was evaluated using the Fastqc 0.11.3  
349 (<https://github.com/s-andrews/FastQC>).

350

### 351 **Extracting ARGs**

352 All filtered, non-subsampled samples were mapped against

353 *nucleotide\_fasta\_protein\_homolog\_model* from the antimicrobial resistance database CARD 2.0.0<sup>32</sup>

354 using Bowtie2 2.2.5 with parameter *-very-sensitive-local*. Mapped reads were filtered from

355 unmapped reads, sorted and indexed using Samtools 1.5<sup>53</sup>. Statistics for the length, coverage and

356 number of reads mapped for each ARG were extracted using Bedtools 2.25.0<sup>54</sup>. ARGs with a

357 coverage of reads mapped below and equal to 90 % were discarded. Each ARG was annotated with

358 the “Drug Class” and “Resistance Mechanism” using CARD 2.0.3 metadata.

359

### 360 **Percentage of samples containing ARGs, ARG classes and ARG mechanisms**

361 To show whether the percentages of samples containing an ARG class were consistent across the

362 same number of reads, metagenomes were first subsampled using seqtk 1.2

363 (<https://github.com/lh3/seqtk>) with parameter *seed -s100*. 6.9 million reads were subsampled from

364 18 saliva samples with the lowest number of reads greater than 6.9 million reads, from each cohort:

365 China, Fiji, the Philippines and Western Europe. 18 million reads were subsampled from 18 dental

366 samples with the lowest number of reads greater than 18 million reads from both China and US

367 cohorts. 16.9 million reads were subsampled from 18 stool samples with the lowest number of reads

368 greater than 16.9 million reads from China, Fiji, the US and Western Europe cohorts. These were

369 mapped to CARD 3.0.0 as described in *Extracting ARGs*.

370 R 3.5.1 was used for all downstream analysis. Percentages of samples containing an ARG, ARG

371 class and mechanism were calculated from these samples. 95 % confidence intervals (CIs) were

372 evaluated from percentages extracted from bootstrapping samples 100 times for each cohort and

373 sample type. The percentages were also visualised against antibiotic use measured as the Defined

374 Daily Dose Per 1000 individuals in 2015 from China, the Philippines, Western Europe (France and

375 Germany) and the US, from ResistanceMap (<https://resistancemap.cddep.org/>) accessed on 19<sup>th</sup>  
376 February 2019. No antibiotic use data was available for Fiji.

377

### 378 **ARG-Phage analysis**

379 The reads of the samples specified in “Percentage of samples containing ARGs, ARG classes and  
380 ARG mechanisms” were assembled using SPAdes 3.9.0 with parameters *-k 21,33,55 -only-*  
381 *assembler --meta*<sup>55</sup>. These assemblies were aligned against CARD 3.0.0 using BLASTN 2.7.1 with  
382 parameters *-outfmt 6 -evaluate 1e-10*. Genes were predicted from the assemblies using Prodigal  
383 2.6.3<sup>56</sup> with parameter *-p meta*, then predicted genes were aligned against the PATRIC virulence  
384 protein database<sup>57</sup> (downloaded 25<sup>th</sup> January 2019) using BLASTP 2.7.1 with parameter *-outfmt 6*  
385 *-evaluate 1e-10*. Contigs were filtered where a resident predicted gene aligned to at least one putative  
386 phage protein. All hits were filtered by an e-value  $\leq 1e-50$  and an identity  $\geq 80$ . For query  
387 sequence hits that overlapped greater than 20% of the smallest query sequence hit, hits were  
388 identified that had the lowest e-value, or the highest identity for hits with the same e-values. Other  
389 hits were discarded. ARGs found on contigs that aligned against a putative phage protein were  
390 regarded as syntenic with the phage of that phage protein.

391

### 392 **Principal coordinates analysis**

393 Principal coordinates analysis was applied to the binary distance between ARG presence or absence  
394 profiles for each sample (excluding longitudinal US samples) using the vegan 2.5-2 package  
395 (<https://cran.r-project.org/web/packages/vegan/index.html>). Resistotypes were extracted using  
396 hierarchical clustering of the euclidean distance between principal coordinates with eigenvalues  
397 above zero. Silhouette analysis was used to determine the optimum number of resistotypes using the  
398 cluster 2.0.7.1 package (<https://cran.r-project.org/web/packages/cluster/index.html>). The number of  
399 resistotypes is defined by the number of clusters greater than two with the largest silhouette width.



400

#### 401 **Abundance of ARGs**

402 To quantify the abundance of ARGs within each sample, the reads per kilobase of read per million  
403 (RPKM) was calculated for every sample. The relative abundance of ARGs for each country and  
404 sample type was calculated by dividing the RPKM by the sum of RPKM for each country and  
405 sample type. The relative abundance of ARGs for each sample and sample type was calculated by  
406 dividing the RPKM by the sum of the RPKM for each sample. Differential abundance of ARGs  
407 between paired sample types from each country were calculated using the DESeq2 1.20.0  
408 package<sup>43</sup> as recommended by Jonsson et al.<sup>58</sup>.

409

#### 410 **ARG diversity**

411 To ensure the ARG richness could be compared statistically across different sample types from the  
412 same individuals<sup>59</sup>, the metagenomes (excluding longitudinal US samples) were subsampled using  
413 seqtk 1.2 with seed *-s100*. Paired samples from the same individuals in each of the following  
414 groups containing two sample types were subsampled to a number rounded down by two significant  
415 figures from the lowest number of reads in the group, apart from Fiji, where 1 million reads were  
416 subsampled, due to a low number of reads for a few samples. Fiji samples originally containing  
417 fewer than 1 million reads were excluded from the analysis.

418 *China dental vs. saliva*: 3.5 million reads were sampled from China dental (n = 30) and paired  
419 saliva (n = 30) samples.

420 *China stool vs. saliva*: 3.5 million reads were sampled from China stool (n = 31) and paired saliva  
421 (n = 31) samples.

422 *China stool vs. dental*: 14 million reads were sampled from China stool (n = 30) and paired dental  
423 (n = 30) samples.

424 *US buccal mucosa vs. dental*: 690,000 reads were sampled from US buccal mucosa (n = 86) and  
425 paired dental (n = 86) samples.

426 *US buccal mucosa vs. dorsum of tongue*: 690,000 reads were sampled from US buccal mucosa (n =  
427 86) and paired dorsum of tongue (n = 86) samples.

428 *US buccal mucosa vs. stool*: 700,000 reads were sampled from and US buccal mucosa (n = 64) and  
429 paired stool (n = 64) samples.

430 *US dental vs. dorsum of tongue*: 4.2 million reads were sampled from US dental (n = 89) and paired  
431 dorsum of tongue (n = 89) samples.

432 *US dental vs. stool*: 4.2 million reads were sampled from US dental (n = 68) and paired stool (n =  
433 68) samples.

434 *US dorsum of tongue vs. stool*: 14 million reads were sampled from US dorsum of tongue (n = 69)  
435 and paired stool (n = 69) samples.

436 *Fiji saliva vs. stool*: 1 million reads were sampled from Fiji saliva (n = 127) and paired stool (n =  
437 127) samples.

438 *Western Europe saliva vs. stool*: 3.2 million reads were sampled from Western Europe saliva (n =  
439 20: 4 from Germany and 16 from France) and paired stool (n = 20: 4 from Germany and 16 from  
440 France) samples. These were mapped to the CARD database as described in Methods *Percentage of*  
441 *samples containing ARG classes*.

442 Once the metagenomes were subsampled, ARGs extracted and filtering by coverage, the ARG  
443 diversity per sample was measured as the ARG richness, as recommended previously by Bengtsson-  
444 Palme et al.<sup>60</sup>. The ARG richness was calculated as the number of unique ARGs for every sample.  
445 The ARG richness between samples in each group were tested for statistical significance with a  
446 Mann-Whitney, paired, two-sided t-test.

447

#### 448 **Correlation analysis**

449 MetaPhlan2 2.6.0<sup>61</sup> was used to extract taxonomic composition from all samples. Spearman's  
450 correlation was applied to relative abundances of reads mapped to ARG and MetaPhlan2 species  
451 profiles for paired samples. ARGs and species that were not found in more than half of samples for  
452 each country were removed, to alleviate the bias from potential joint-ranking of zero values by  
453 Spearman's rank. The rho and p-values were calculated using the stats package in R and the p-  
454 values were adjusted with Benjamini-Hochberg where FDR < 5 %. Correlations were found from  
455 China saliva and paired stool samples, and Philippines saliva samples. No significant correlations  
456 could be found from Fiji, Western Europe or US samples.

457

#### 458 **Data Availability**

459 ARG data, figures, tables and script to run analysis are available at

460 <https://www.dropbox.com/sh/jy9h7ghgen6msgz/AABoMMRXY7BkBKdFY6kIpY3Aa?dl=0>

461 High-resolution figures are available at <https://figshare.com/s/a1295c1ece3a89769567>

462

#### 463 **Code Availability**

464 R package for resistome analysis is available at <https://github.com/blue-moon22/resistomeAnalysis>

465

466

### **References**

1. *Antimicrobial resistance: global report on surveillance*. (World Health Organization, 2014).
2. Rose, G. *et al.* Antibiotic resistance potential of the healthy preterm infant gut microbiome. *PeerJ* **5**, e2928 (2017).
3. Feng, J. *et al.* Antibiotic Resistome in a large-scale healthy human gut microbiota deciphered by metagenomic and network analyses. *Environmental Microbiology* n/a-n/a doi:10.1111/1462-2920.14009
4. Forslund, K. *et al.* Country-specific antibiotic use practices impact the human gut resistome. *Genome Res.* **23**, 1163–1169 (2013).

5. Rahman, S. F., Olm, M. R., Morowitz, M. J. & Banfield, J. F. Machine Learning Leveraging Genomes from Metagenomes Identifies Influential Antibiotic Resistance Genes in the Infant Gut Microbiome. *mSystems* **3**, e00123-17 (2018).
6. Hu, Y. *et al.* Metagenome-wide analysis of antibiotic resistance genes in a large cohort of human gut microbiota. *Nature Communications* **4**, 2151 (2013).
7. Pärnänen, K. *et al.* Maternal gut and breast milk microbiota affect infant gut antibiotic resistome and mobile genetic elements. *Nat Commun* **9**, (2018).
8. Thomas, M. *et al.* Metagenomic characterization of the effect of feed additives on the gut microbiome and antibiotic resistome of feedlot cattle. *Scientific Reports* **7**, 12257 (2017).
9. Munk, P. *et al.* Abundance and diversity of the faecal resistome in slaughter pigs and broilers in nine European countries. *Nature Microbiology* **3**, 898 (2018).
10. Pehrsson, E. C., Forsberg, K. J., Gibson, M. K., Ahmadi, S. & Dantas, G. Novel resistance functions uncovered using functional metagenomic investigations of resistance reservoirs. *Front. Microbiol.* **4**, (2013).
11. Ma, L. *et al.* Catalogue of antibiotic resistome and host-tracking in drinking water deciphered by a large scale survey. *Microbiome* **5**, 154 (2017).
12. Noyes, N. R. *et al.* Characterization of the resistome in manure, soil and wastewater from dairy and beef production systems. *Scientific Reports* **6**, 24645 (2016).
13. Bengtsson-Palme, J., Boulund, F., Fick, J., Kristiansson, E. & Larsson, D. G. J. Shotgun metagenomics reveals a wide array of antibiotic resistance genes and mobile elements in a polluted lake in India. *Front. Microbiol.* **5**, (2014).
14. Knoll, B., Tleyjeh, I. M., Steckelberg, J. M., Wilson, W. R. & Baddour, L. M. Infective Endocarditis Due to Penicillin-Resistant Viridans Group Streptococci. *Clin Infect Dis* **44**, 1585–1592 (2007).
15. Shaw, L. P., Smith, A. M. & Roberts, A. P. The oral microbiome. *Emerging Topics in Life Sciences* **1**, 287–296 (2017).
16. Zaura, E. *et al.* Same Exposure but Two Radically Different Responses to Antibiotics: Resilience of the Salivary Microbiome versus Long-Term Microbial Shifts in Feces. *mBio* **6**, e01693-15 (2015).

17. Roberts, A. P. & Kreth, J. The impact of horizontal gene transfer on the adaptive ability of the human oral microbiome. *Front Cell Infect Microbiol* **4**, (2014).
18. Witherden, E. A., Bajanca-Lavado, M. P., Tristram, S. G. & Nunes, A. Role of inter-species recombination of the *ftsI* gene in the dissemination of altered penicillin-binding-protein-3-mediated resistance in *Haemophilus influenzae* and *Haemophilus haemolyticus*. *J. Antimicrob. Chemother.* **69**, 1501–1509 (2014).
19. Chaffanel, F., Charron-Bourgoin, F., Libante, V., Leblond-Bourget, N. & Payot, S. Resistance Genes and Genetic Elements Associated with Antibiotic Resistance in Clinical and Commensal Isolates of *Streptococcus salivarius*. *Appl. Environ. Microbiol.* **81**, 4155–4163 (2015).
20. Diaz-Torres, M. L. *et al.* Determining the antibiotic resistance potential of the indigenous oral microbiota of humans using a metagenomic approach. *FEMS Microbiol Lett* **258**, 257–262 (2006).
21. Seville, L. A. *et al.* Distribution of tetracycline and erythromycin resistance genes among human oral and fecal metagenomic DNA. *Microb. Drug Resist.* **15**, 159–166 (2009).
22. Clemente, J. C. *et al.* The microbiome of uncontacted Amerindians. *Science Advances* **1**, e1500183 (2015).
23. Warinner, C. *et al.* Pathogens and host immunity in the ancient human oral cavity. *Nature Genetics* **46**, 336–344 (2014).
24. Zhang, X. *et al.* The oral and gut microbiomes are perturbed in rheumatoid arthritis and partly normalized after treatment. *Nature Medicine* **21**, 895–905 (2015).
25. Brito, I. L. *et al.* Mobile genes in the human microbiome are structured from global to individual scales. *Nature* **535**, 435–439 (2016).
26. Lassalle, F. *et al.* Oral microbiomes from hunter-gatherers and traditional farmers reveal shifts in commensal balance and pathogen load linked to diet. *Mol. Ecol.* **27**, 182–195 (2018).
27. Voigt, A. Y. *et al.* Temporal and technical variability of human gut metagenomes. *Genome Biology* **16**, 73 (2015).
28. Zeller, G. *et al.* Potential of fecal microbiota for early-stage detection of colorectal cancer. *Molecular Systems Biology* **10**, 766 (2014).

29. Schmidt, T. S. B. *et al.* Extensive transmission of microbes along the gastrointestinal tract. *eLife* **8**, e42693 (2019).
30. Human Microbiome Project Consortium. A framework for human microbiome research. *Nature* **486**, 215–221 (2012).
31. Piddock, L. J. V. Assess drug-resistance phenotypes, not just genotypes. *Nature Microbiology* **1**, 16120 (2016).
32. McArthur, A. G. *et al.* The comprehensive antibiotic resistance database. *Antimicrob. Agents Chemother.* **57**, 3348–3357 (2013).
33. Ambrose, K. D., Nisbet, R. & Stephens, D. S. Macrolide efflux in *Streptococcus pneumoniae* is mediated by a dual efflux pump (mel and mef) and is erythromycin inducible. *Antimicrob. Agents Chemother.* **49**, 4203–4209 (2005).
34. Santagati, M., Lupo, A., Scillato, M., Di Martino, A. & Stefani, S. Conjugal mobilization of the mega element carrying mef(E) from *Streptococcus salivarius* to *Streptococcus pneumoniae*. *FEMS Microbiol Lett* **290**, 79–84 (2009).
35. Brenciani, A. *et al.* Phim46.1, the main *Streptococcus pyogenes* element carrying mef(A) and tet(O) genes. *Antimicrob. Agents Chemother.* **54**, 221–229 (2010).
36. Lansang, M. A. *et al.* Purchase of antibiotics without prescription in Manila, The Philippines. Inappropriate choices and doses. *Journal of Clinical Epidemiology* **43**, 61–67 (1990).
37. Chang, J. *et al.* Sale of antibiotics without a prescription at community pharmacies in urban China: a multicentre cross-sectional survey. *J. Antimicrob. Chemother.* **72**, 1235–1242 (2017).
38. Auta, A. *et al.* Global access to antibiotics without prescription in community pharmacies: A systematic review and meta-analysis. *Journal of Infection* (2018).  
doi:10.1016/j.jinf.2018.07.001
39. Liu, X., Steele, J. C. & Meng, X.-Z. Usage, residue, and human health risk of antibiotics in Chinese aquaculture: A review. *Environ. Pollut.* **223**, 161–169 (2017).
40. Cheng, G. *et al.* Antibiotic alternatives: the substitution of antibiotics in animal husbandry? *Front. Microbiol.* **5**, (2014).
41. Stanton, T. B. A call for antibiotic alternatives research. *Trends in Microbiology* **21**, 111–113 (2013).

42. Rousseeuw, P. J. Silhouettes: A graphical aid to the interpretation and validation of cluster analysis. *Journal of Computational and Applied Mathematics* **20**, 53–65 (1987).
43. Love, M. I., Huber, W. & Anders, S. Moderated estimation of fold change and dispersion for RNA-seq data with DESeq2. *Genome Biology* **15**, 550 (2014).
44. Smith, C. J., Bennett, T. K. & Parker, A. C. Molecular and genetic analysis of the *Bacteroides uniformis* cephalosporinase gene, *cblA*, encoding the species-specific beta-lactamase. *Antimicrob. Agents Chemother.* **38**, 1711–1715 (1994).
45. Podschun, R. & Ullmann, U. *Klebsiella* spp. as Nosocomial Pathogens: Epidemiology, Taxonomy, Typing Methods, and Pathogenicity Factors. *Clinical Microbiology Reviews* **11**, 589–603 (1998).
46. Roberts, A. P. & Mullany, P. Oral biofilms: a reservoir of transferable, bacterial, antimicrobial resistance. *Expert Review of Anti-infective Therapy* **8**, 1441–1450 (2010).
47. Roldán, S., Herrera, D. & Sanz, M. Biofilms and the tongue: therapeutical approaches for the control of halitosis. *Clin Oral Invest* **7**, 189–197 (2003).
48. Palleja, A. *et al.* Recovery of gut microbiota of healthy adults following antibiotic exposure. *Nature Microbiology* **3**, 1255 (2018).
49. Greub, G. Culturomics: a new approach to study the human microbiome. *Clinical Microbiology and Infection* **18**, 1157–1159 (2012).
50. Mullany, P. Functional metagenomics for the investigation of antibiotic resistance. *Virulence* **5**, 443–447 (2014).
51. Criscuolo, A. & Brisse, S. AlienTrimmer: A tool to quickly and accurately trim off multiple short contaminant sequences from high-throughput sequencing reads. *Genomics* **102**, 500–506 (2013).
52. Langmead, B. & Salzberg, S. L. Fast gapped-read alignment with Bowtie 2. *Nat. Methods* **9**, 357–359 (2012).
53. Li, H. *et al.* The Sequence Alignment/Map format and SAMtools. *Bioinformatics* **25**, 2078–2079 (2009).
54. Quinlan, A. R. & Hall, I. M. BEDTools: a flexible suite of utilities for comparing genomic features. *Bioinformatics* **26**, 841–842 (2010).

55. Bankevich, A. *et al.* SPAdes: A New Genome Assembly Algorithm and Its Applications to Single-Cell Sequencing. *J Comput Biol* **19**, 455–477 (2012).
56. Hyatt, D. *et al.* Prodigal: prokaryotic gene recognition and translation initiation site identification. *BMC Bioinformatics* **11**, 119 (2010).
57. Wattam, A. R. *et al.* PATRIC, the bacterial bioinformatics database and analysis resource. *Nucleic Acids Res* **42**, D581–D591 (2014).
58. Jonsson, V., Österlund, T., Nerman, O. & Kristiansson, E. Statistical evaluation of methods for identification of differentially abundant genes in comparative metagenomics. *BMC Genomics* **17**, 78 (2016).
59. Bengtsson-Palme, J., Larsson, D. G. J. & Kristiansson, E. Using metagenomics to investigate human and environmental resistomes. *J Antimicrob Chemother* **72**, 2690–2703 (2017).
60. Bengtsson-Palme, J. The diversity of uncharacterized antibiotic resistance genes can be predicted from known gene variants—but not always. *Microbiome* **6**, 125 (2018).
61. Truong, D. T. *et al.* MetaPhlAn2 for enhanced metagenomic taxonomic profiling. *Nat Meth* **12**, 902–903 (2015).

467

468

### **Acknowledgements**

469 The research was supported by the Centre for Host-Microbiome Interactions, King’s College  
470 London, the Biotechnology and Biological Sciences Research Council (BBSRC) (Grant No.  
471 BB/M009513/1) awarded to D.L.M., and Engineering and Physical Sciences Research Council  
472 (EPSRC), BBSRC and UK Research and Innovation (UKRI) (Project No. EP/S001301/1) awarded  
473 to S.S.. The authors would like to thank Professor William Wade for constructive criticism of the  
474 manuscript. S.S. acknowledges Uppmax for providing assistance for computational infrastructure.

475

476

### **Author contributions**



477 V.C. and D.L.M. conceived the presented idea. V.C. and D.G-C. conducted the bioinformatics and  
478 data analysis. V.C. and D.L.M. wrote the manuscript with support from D.G-C., E.W., G.B.P., P.M.,  
479 S.L. and S.S.. D.L.M. and D.G-C. oversaw the project.

480

481

482

483

484

485

486

487

488

489

490

491

492

493

494

495

496

497

498

499

500

501

Figures

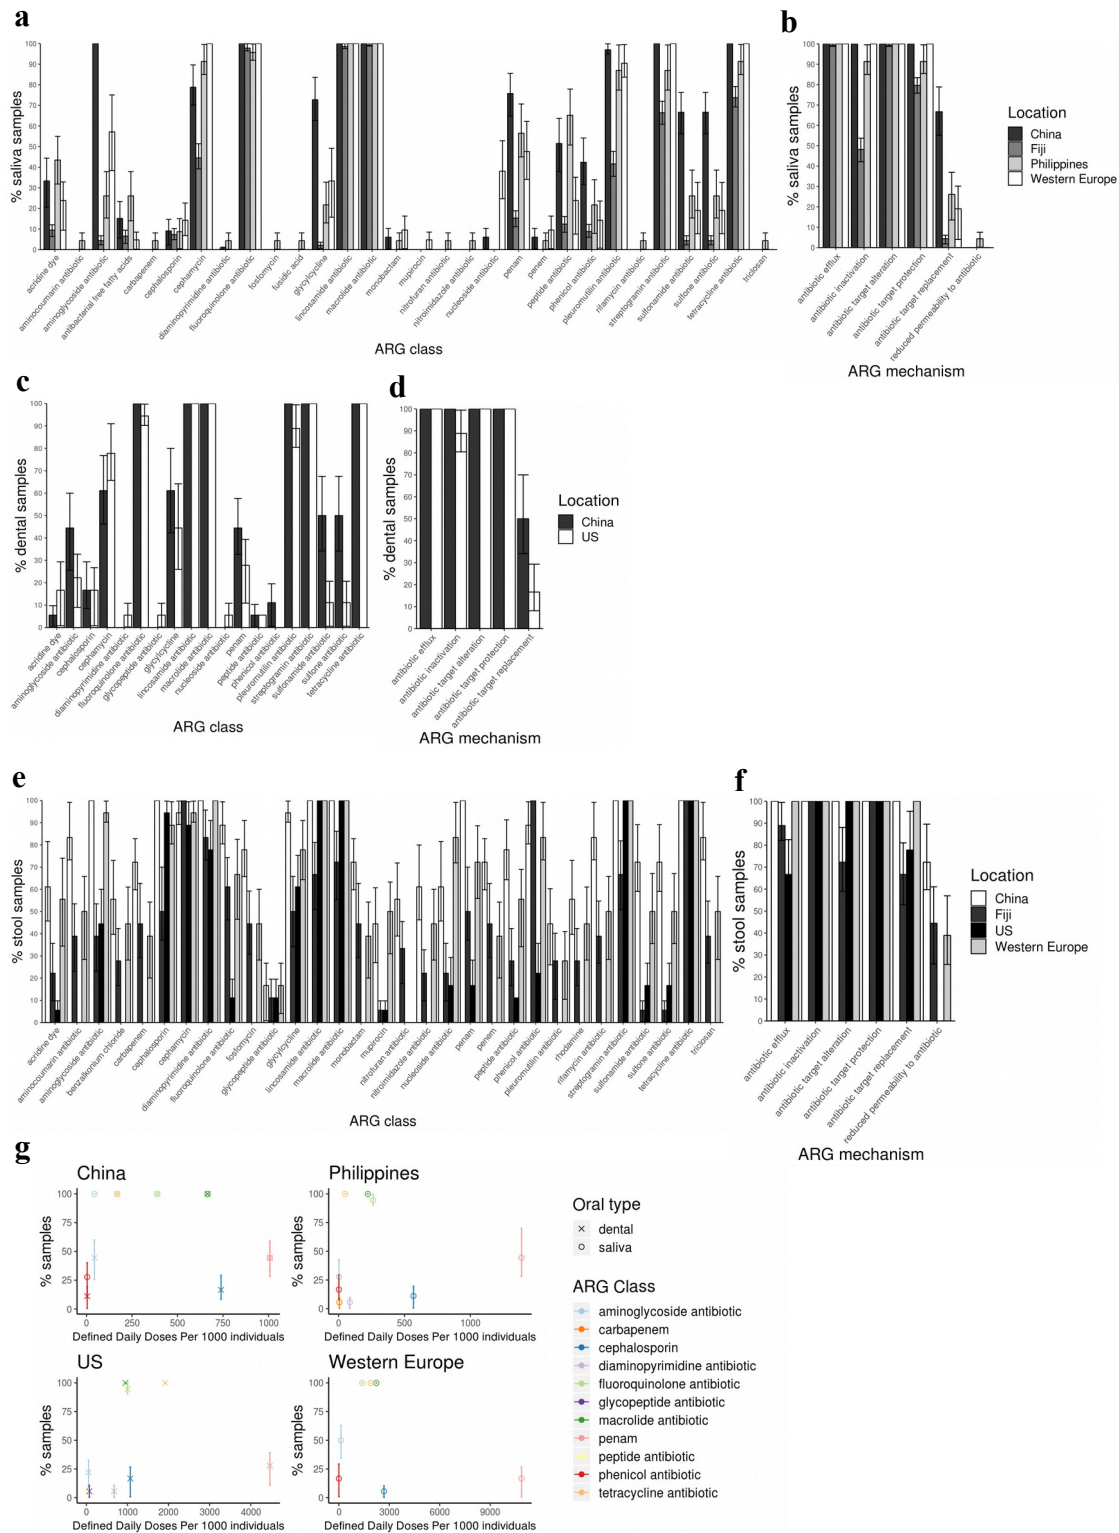

503 **Fig. 1** Percentage of saliva samples from individuals that contain, **a** an ARG class and **b** an ARG mechanism, from  
 504 China (n = 18), Fiji (n = 18), the Philippines (n = 18) and Western Europe (n = 18). Percentage of dental samples from  
 505 individuals that contain, **c** an ARG class and **d** an ARG mechanism, from China (n = 18) and the US (n = 18).  
 506 Percentage of stool samples from individuals that contain, **e** an ARG class and **f** an ARG mechanism, from China (n =  
 507 18), Fiji (n = 18), the US (n = 18) and Western Europe (n = 18). **g** Percentage of the same saliva, dental and stool  
 508 samples containing an ARG class against the Defined Daily Doses Per 1000 individuals in 2015 from China, the  
 509 Philippines, Western Europe (France and Germany) and the US. (Fiji antibiotic use data unavailable.) Error bars are 95  
 510 % confidence intervals (CIs) that were evaluated from percentages extracted from bootstrapping samples 100 times.

511

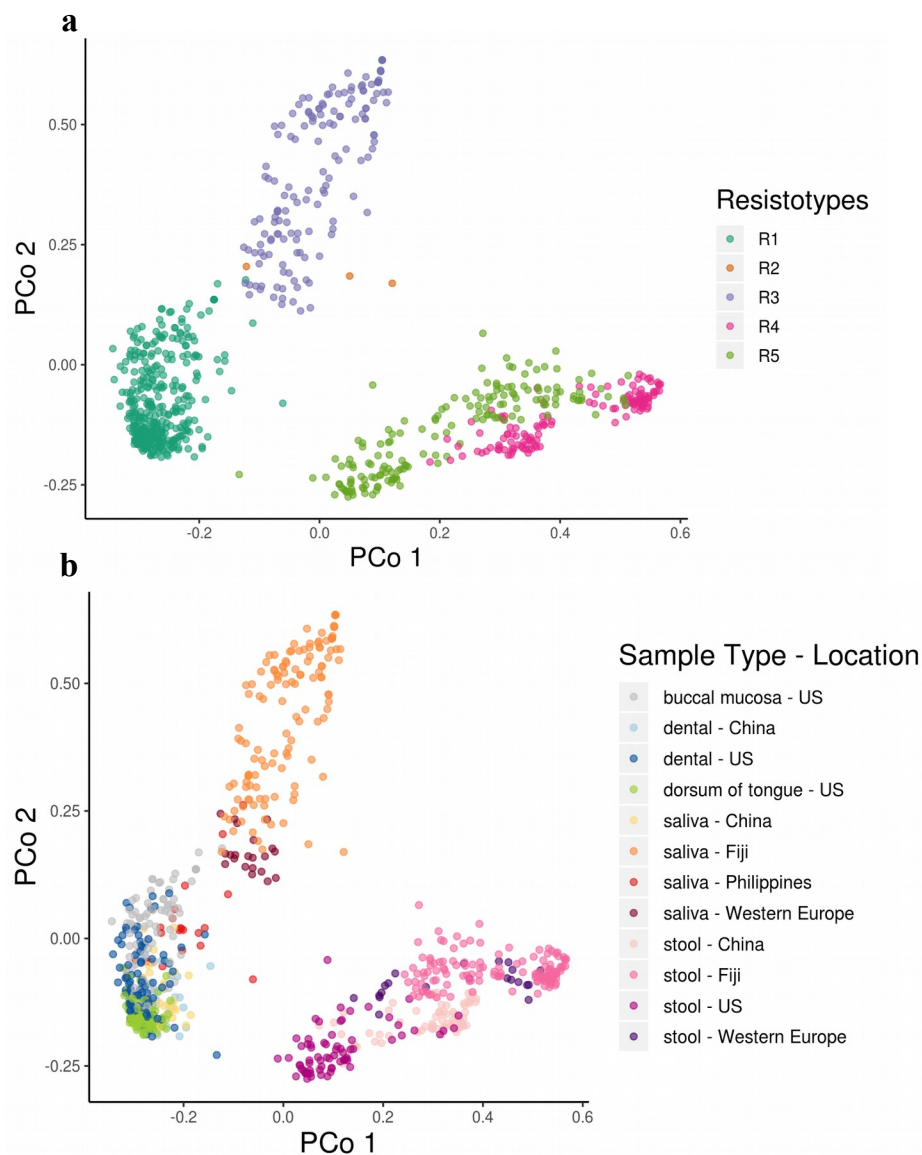

513 **Fig. 2** Principal Coordinates Analysis of the incidence (presence/absence) of ARGs for all samples where each sample  
514 is represented by a point. **a** Samples are labelled as resistotype clusters, evaluated from hierarchical clustering of binary  
515 distance between ARG incidence profiles. Number of clusters was selected using silhouette analysis as the number of  
516 clusters greater than three with the highest silhouette width. **b** Samples are labelled as sample types and locations: US  
517 buccal mucosa (n = 87), China dental (n = 32), US dental (n = 90), US dorsum of tongue (n = 91), China saliva (n = 33),  
518 Fiji saliva (n = 137), Philippines saliva (n = 23), Western Europe saliva (n = 21), China stool (n = 72), Fiji stool (n =  
519 137), US stool (n = 70), and Western Europe stool (n = 21)

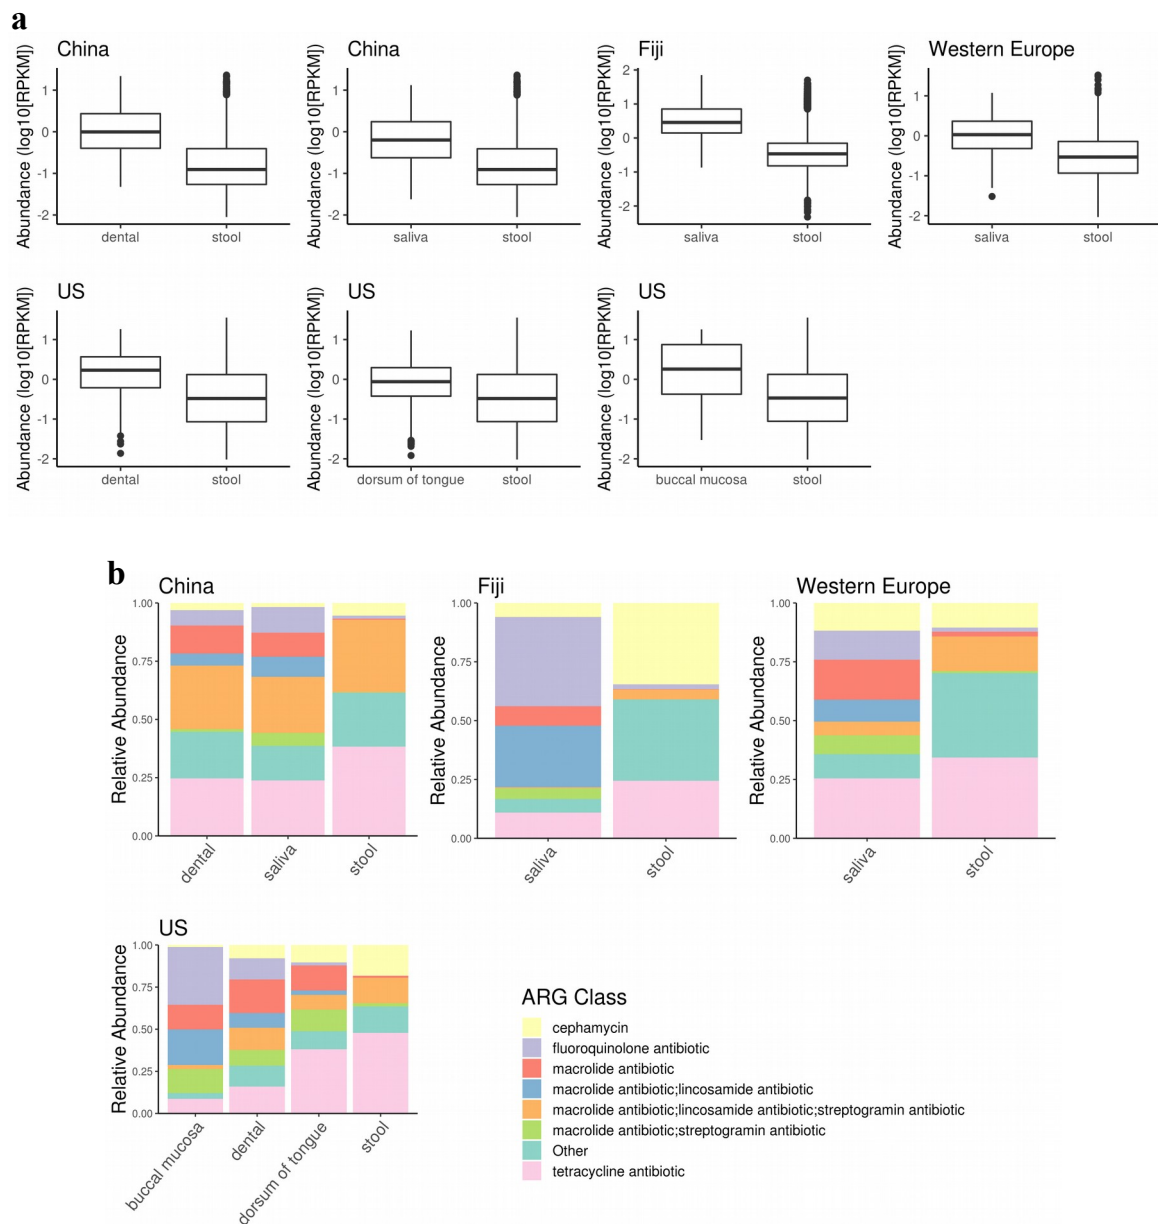

521 **Fig. 3** Resistome abundance for China, Fiji, Western Europe and US. **a** Absolute abundance in log<sub>10</sub> of reads per  
 522 kilobase of read per million (RPKM) of ARGs for paired samples between China stool (n = 30) and dental (n = 30),  
 523 China stool (n = 31) and saliva (n = 31), Fiji saliva (n = 137) and stool (n = 137), Western Europe saliva (n = 21) and  
 524 stool (n = 21), US stool (n = 68) and dental (n = 68), US stool (n = 69) and dorsum of tongue (n = 69), and US stool (n  
 525 = 65) and buccal mucosa (n = 65). **b** Relative abundance of reads labelled by ARG class for each sample type from  
 526 China saliva (n = 33), dental (n = 32) and stool (n = 72), Fiji saliva (n = 137) and stool (n = 137), Western Europe saliva  
 527 (n = 21) and stool (n = 21), and US buccal mucosa (n = 87), dorsum of tongue (n = 91), dental (n = 90) and stool (n =  
 528 70)

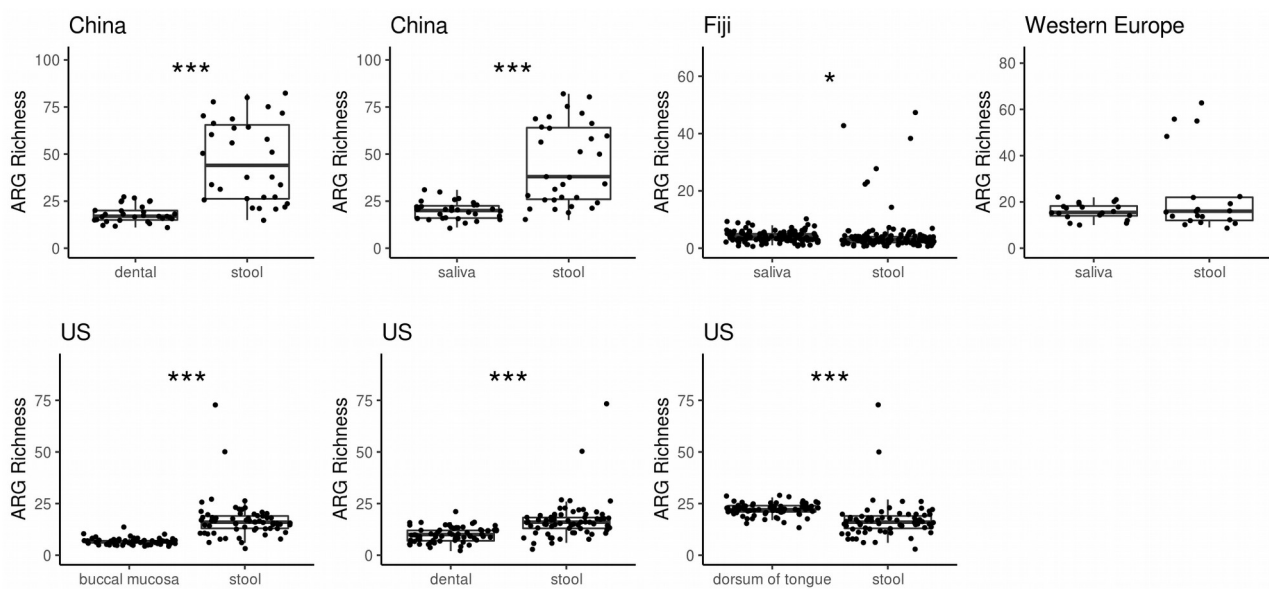

529 **Fig. 4** ARG richness for paired samples between China stool (n = 30) and dental (n = 30), China stool (n = 31) and  
530 saliva (n = 31), Fiji saliva (n = 127) and stool (n = 127), Western Europe saliva (n = 21) and stool (n = 21), US buccal  
531 mucosa (n = 64) and stool (n = 64), US dental (n = 68) and stool (n = 68), and US dorsum of tongue (n = 69) and stool  
532 (n = 69) with Mann-Whitney, paired, two-sided t-test (p-value < 0.05 as \*, < 0.01 as \*\*, < 0.005 as \*\*\*)

533

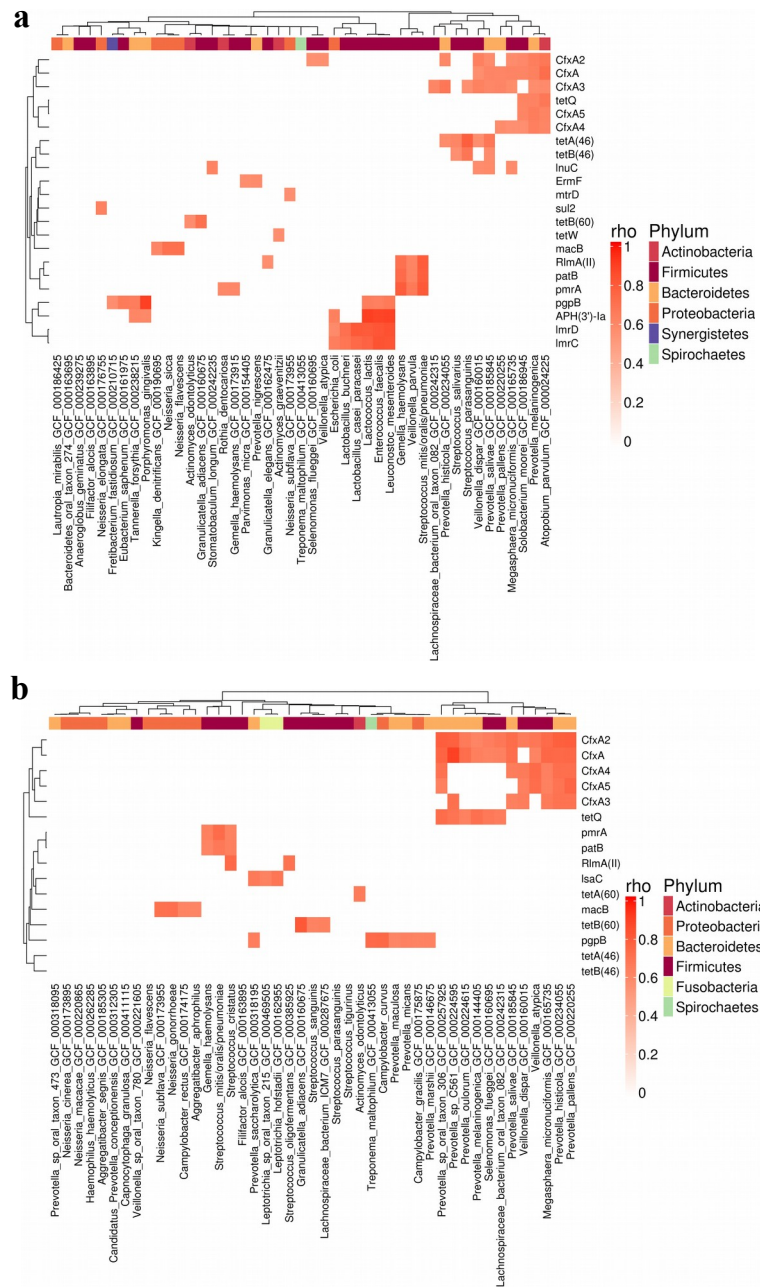

534 **Fig. 5** Spearman's correlation of ARG and species/strain abundance from saliva samples represented as heatmaps of  $\rho$   
 535 between 0 and 1, only where adjusted p-value < 0.05. Each heatmap represents **a** China (n = 31) and **b** Philippines  
 536 saliva (n = 23). Rows and columns are clustered by hierarchical clustering of euclidean distance. Columns are coloured  
 537 by phylum. P-values are adjusted by Bonferroni-Hochberg multiple test correction.
